# Supplementary material for: Fabrication of Alginate-Based O/W Nanoemulsions for Transdermal Drug Delivery of Lidocaine: Influence of the Oil Phase and Surfactant
Source: MDPI journal article supplement (doi:10.3390/molecules26092556), 2021-04-27
Supplement: s1 [file s1]

## Supplementary Materials:

### Fabrication of alginate-based o/w nanoemulsions for transdermal drug delivery of lidocaine: Influence of the oil phase and surfactant

Omar Sarheed\*, Manar Dibi, KVRNS Ramesh and Markus Drechsler

Table S1. Drug content of lidocaine nanoemulsions

| Surfactant-to-oil ratio | Oil type | Drug content | Entrapment efficiency |
|-------------------------|----------|--------------|-----------------------|
| 5:1                     | BE       | 1.260 mg/ml  | 97.17 %               |
|                         | CO       | 1.207 mg/ml  | 97.09%                |
|                         | OA       | 1.241 mg/ml  | 97.10%                |
| 7:1                     | BE       | 1.300 mg/ml  | 97.00 %               |
|                         | CO       | 1.268 mg/ml  | 96.00 %               |
|                         | OA       | 1.207 mg/ml  | 97.00%                |
| 10:1                    | BE       | 1.160 mg/ml  | 97.10 %               |
|                         | CO       | 1.391 mg/ml  | 97.35 %               |
|                         | OA       | 1.109 mg/ml  | 96.00 %               |
| 5:2                     | BE       | 2.459 mg/ml  | 96.65%                |
|                         | CO       | 2.668 mg/ml  | 97.12 %               |
|                         | OA       | 2.193 mg/ml  | 96.72%                |
| 7:2                     | BE       | 2.486 mg/ml  | 96.95%                |
|                         | CO       | 2.567 mg/ml  | 96.87%                |
|                         | OA       | 2.289 mg/ml  | 97.10 %               |
| 10:2                    | BE       | 2.449 mg/ml  | 96.74%                |
|                         | CO       | 2.540 mg/ml  | 96.86%                |
|                         | OA       | 2.326 mg/ml  | 97.00 %               |

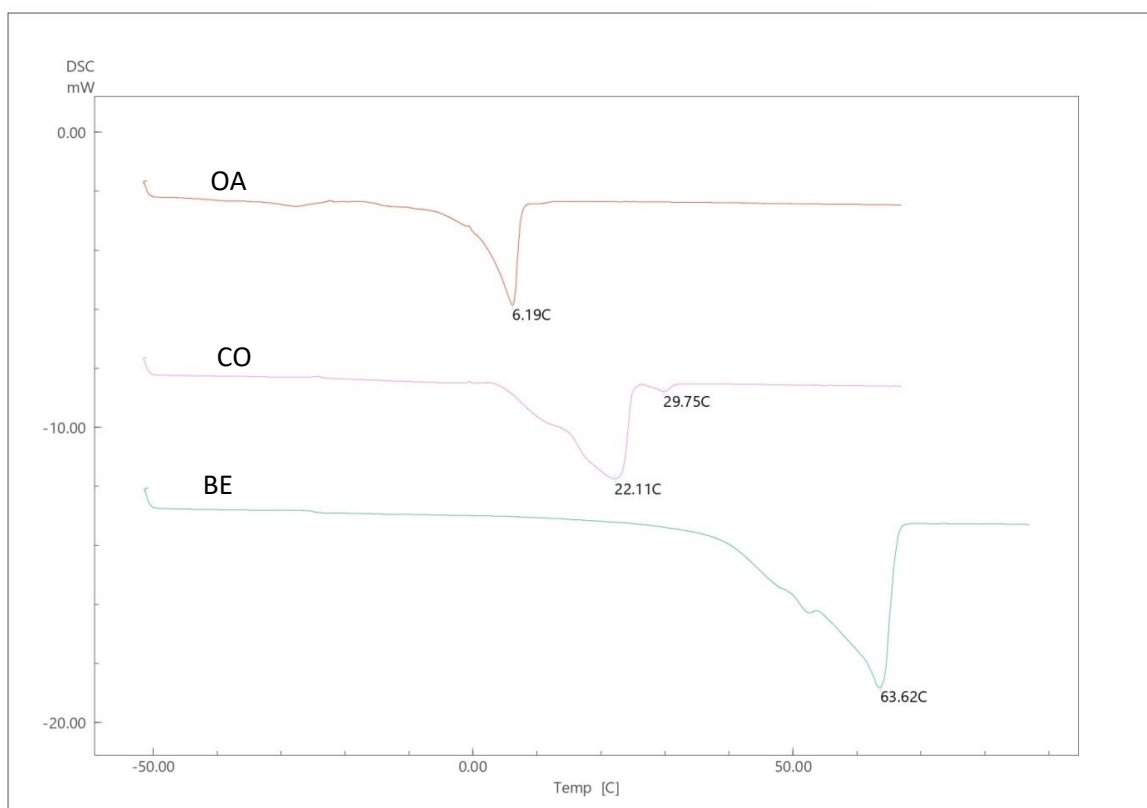

**Figure S1.** Differential scanning calorimetry curves of pure lipids.

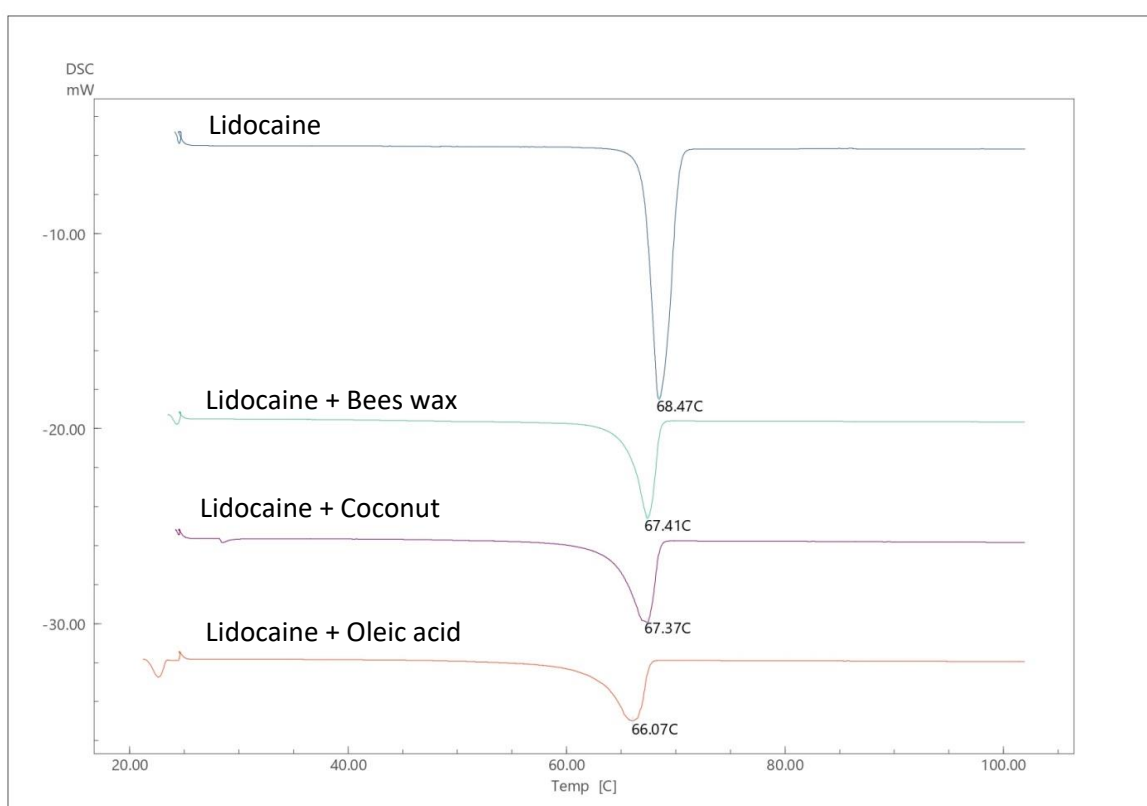

**Figure S2.** Differential scanning calorimetry curves of lidocaine and physical mixtures with lipids.

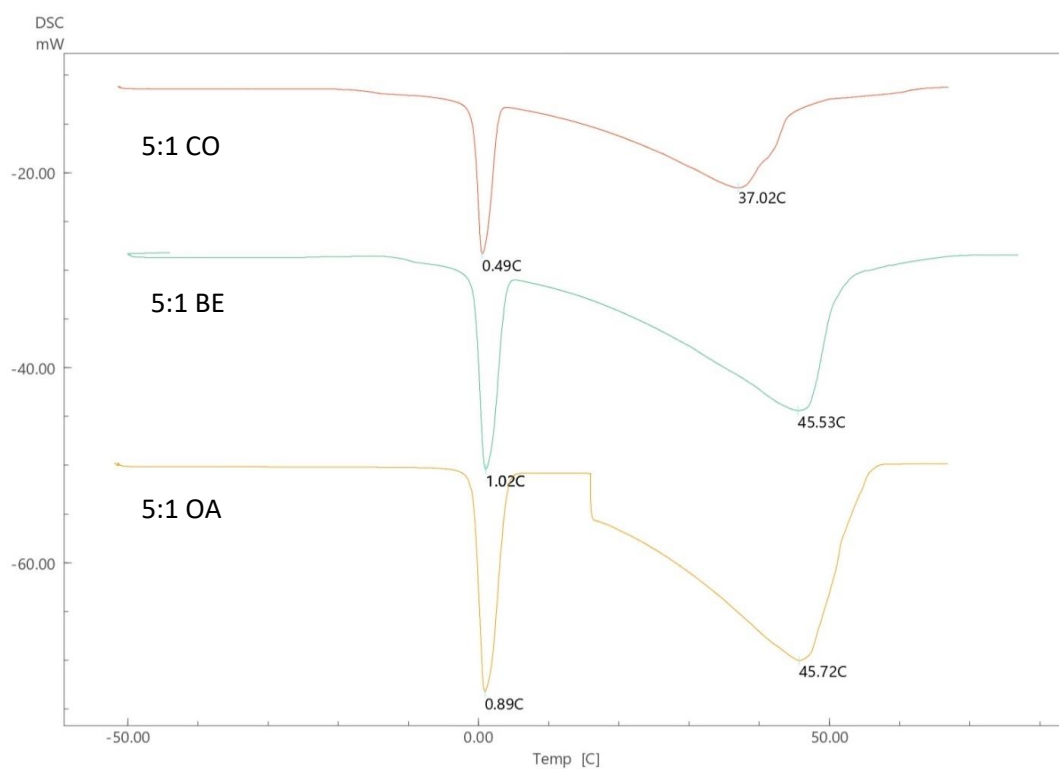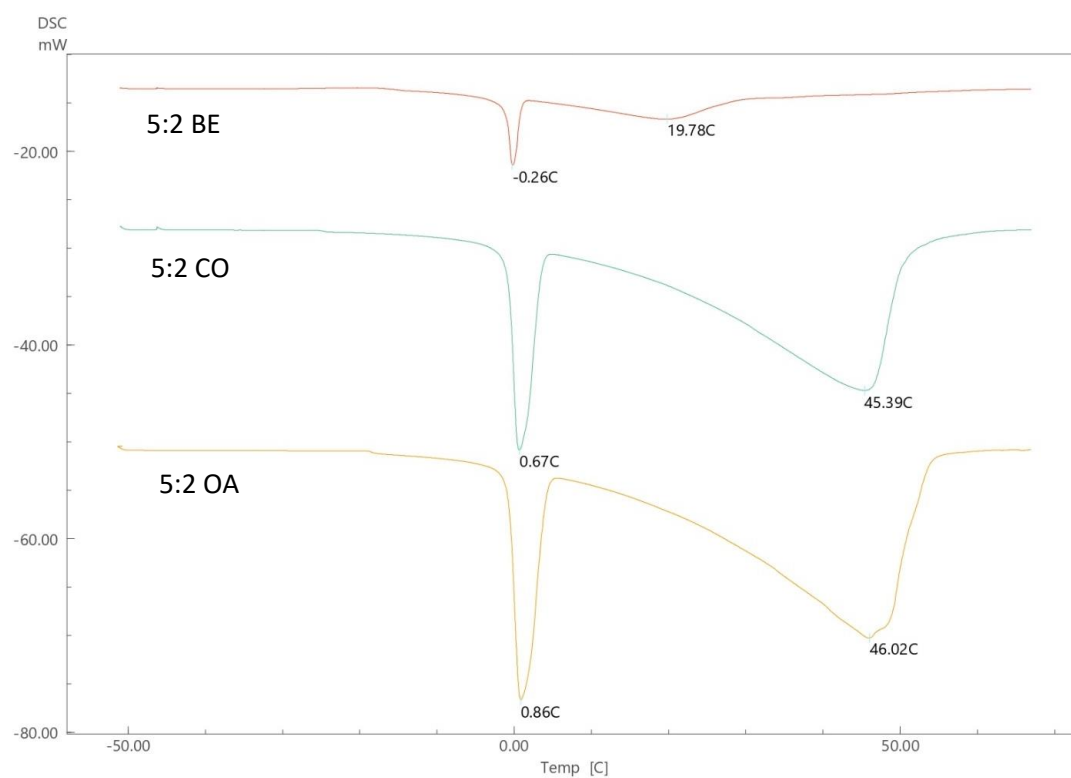

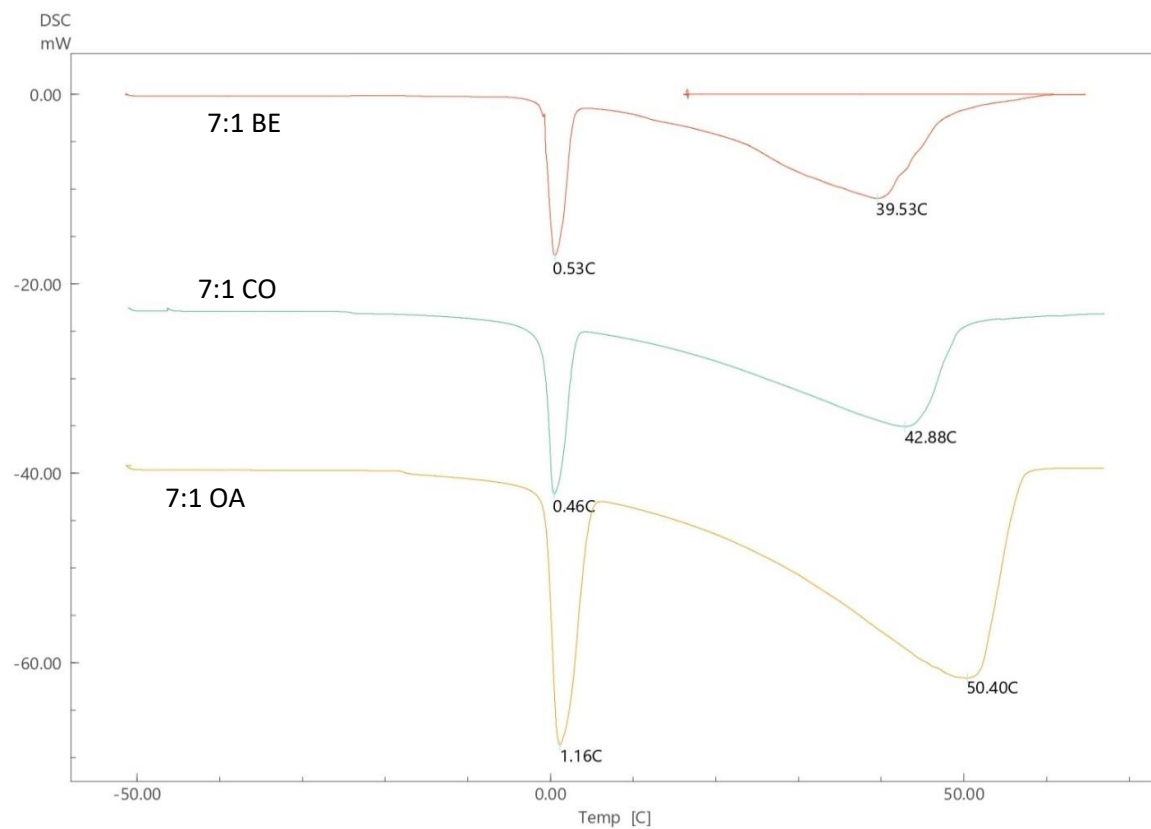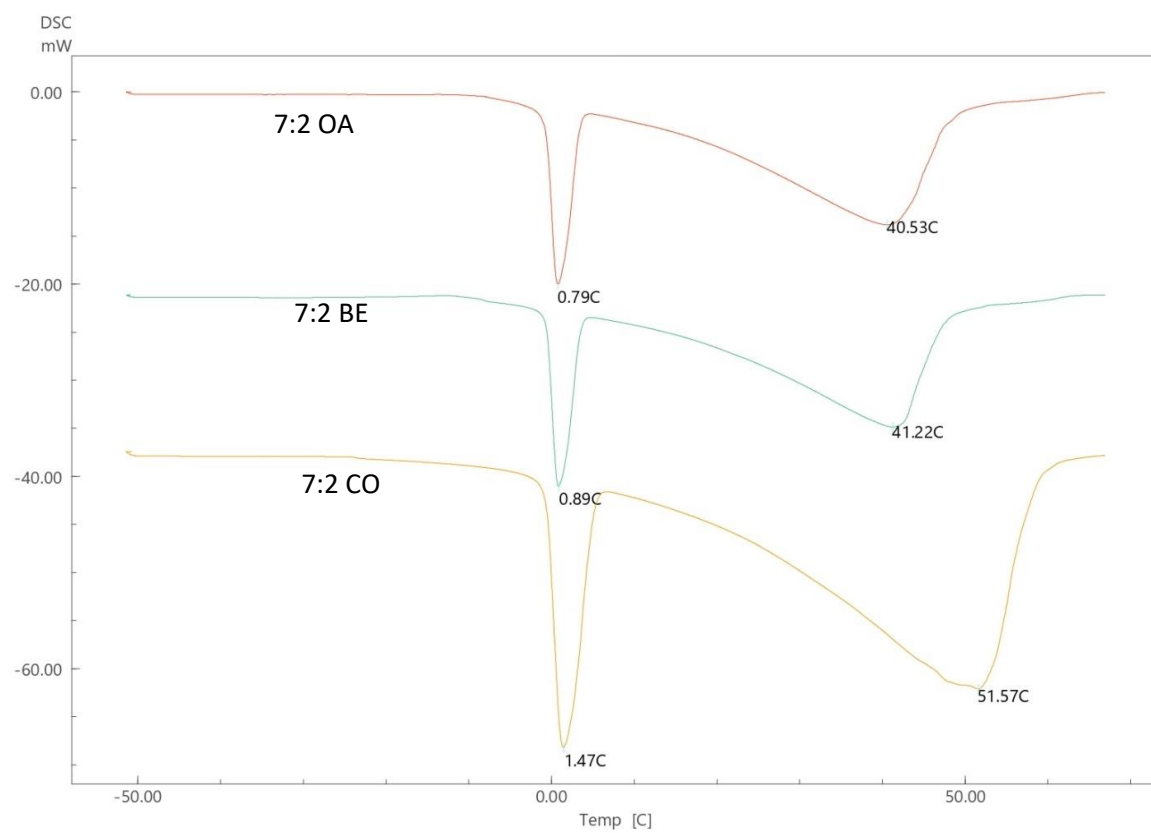

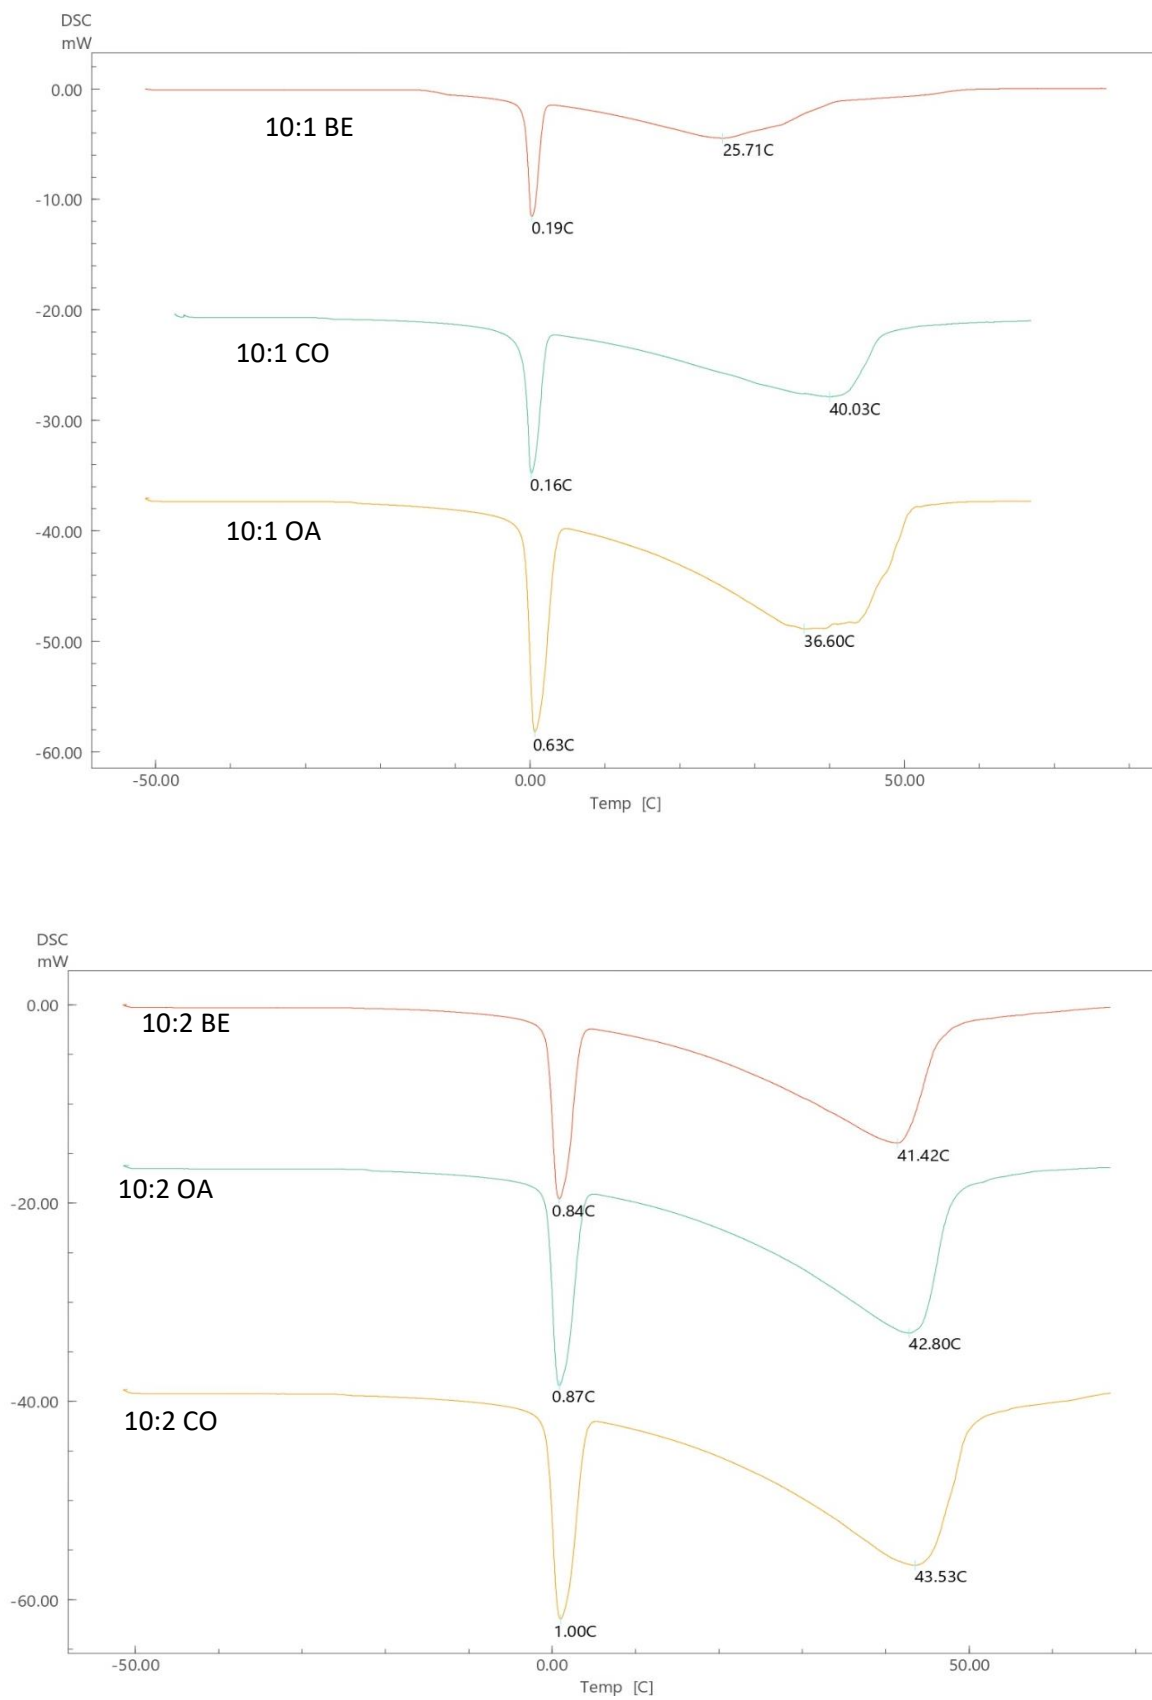

**Figure S3-S8.** Differential scanning calorimetry curves of lidocaine nanoemulsion with different lipids.

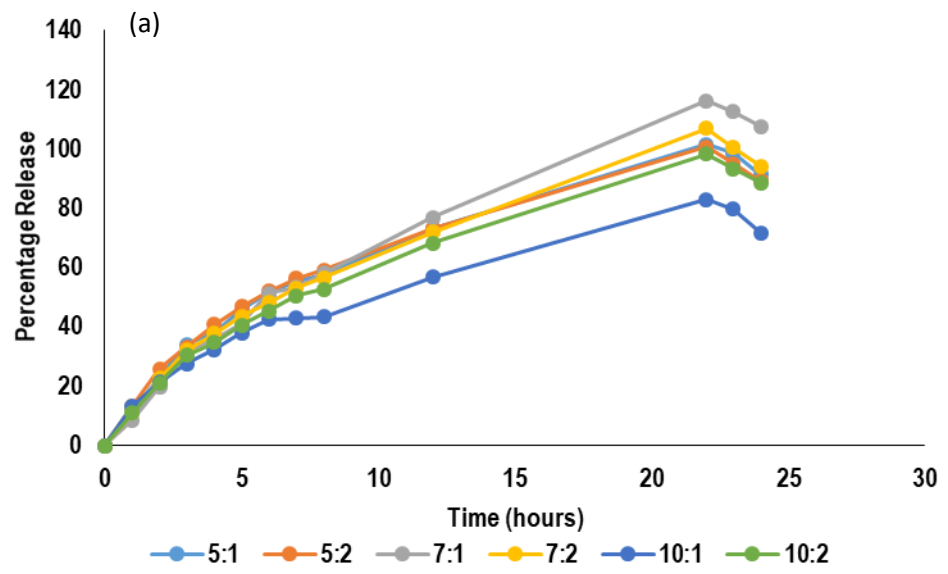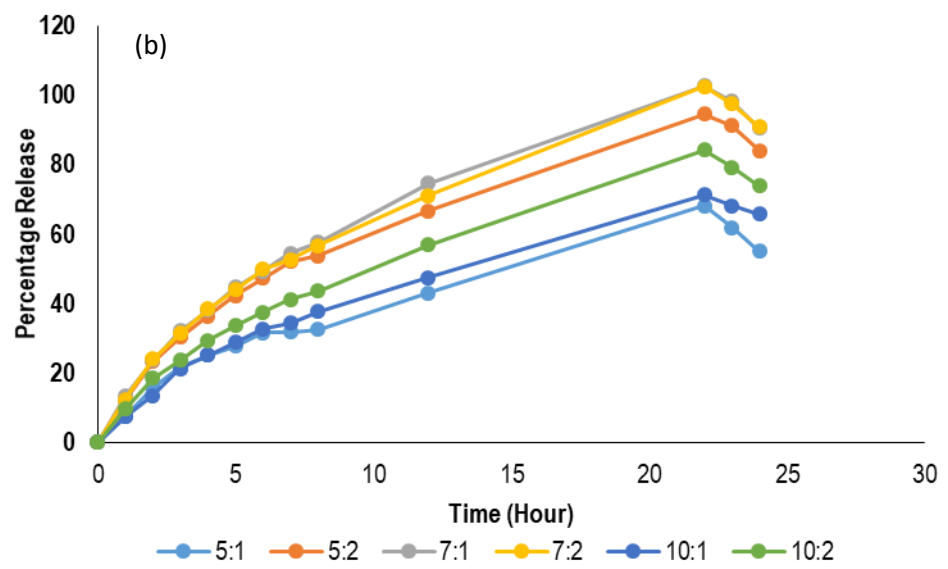

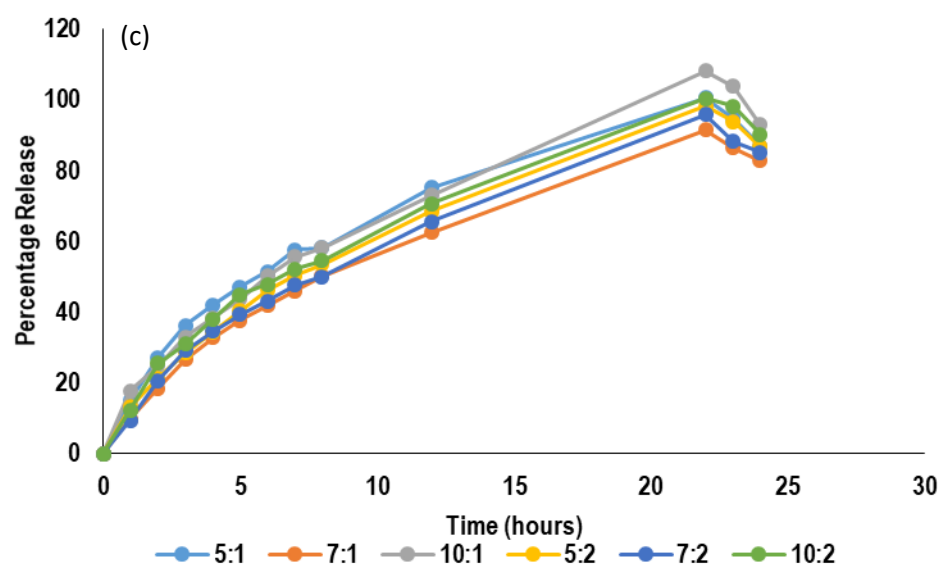

**Figure S9-S11.** Release study of lidocaine nanoemulsion formulated with (a) beeswax, (b) coconut oil and (c) oleic acid
